# Supplementary material for: Mechanistic study of visible light driven photocatalytic degradation of EDC 17α-ethinyl estradiol and azo dye Acid Black-52: phytotoxicity assessment of intermediates
Source: Royal Society of Chemistry journal article supplement (doi:10.1039/c6ra20702b), 2016-01-01
Supplement: c6ra20702b1.pdf [file c6ra20702b1.pdf]

**Fig. S1** (a) UV-Vis absorption spectra of nanoparticles and (b) optical energy gap ( $E_g$ ) and photoluminescence spectra (c) of the prepared nanoparticles

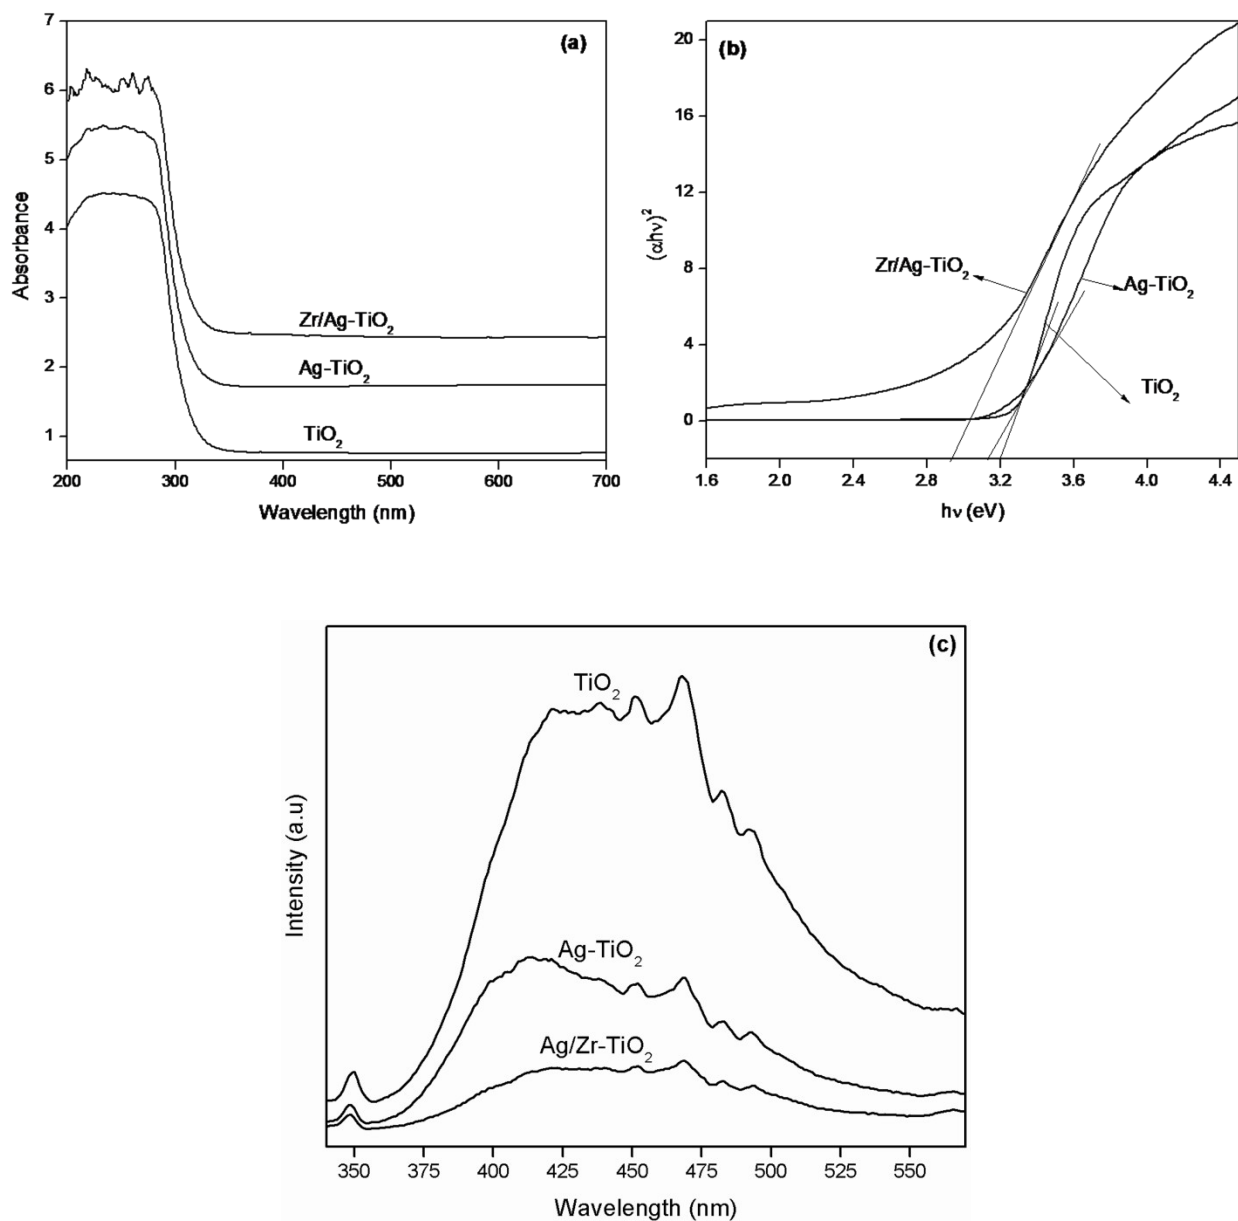

**Fig. S2:** TEM images of Ag-TiO<sub>2</sub> nanoparticles (a) and (b), selected area electron diffraction pattern of the doped nanoparticles (c), EDAX profile (d) showing the elements present in the doped nanoparticles

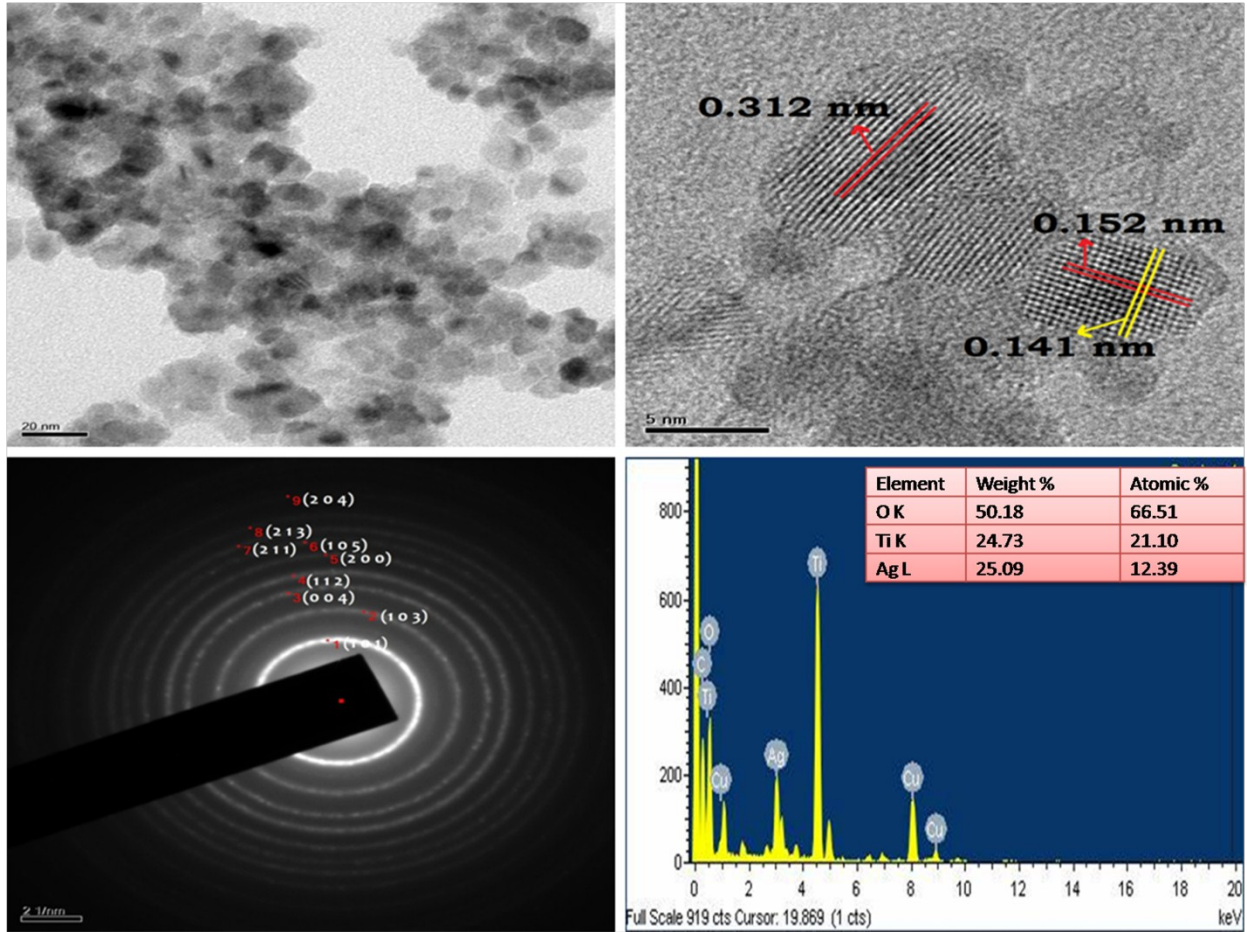

**Fig. S3:** TEM images of Zr/Ag co-doped TiO<sub>2</sub> nanoparticles (a) and (b), selected area electron diffraction pattern of the doped nanoparticles (c), EDAX profile (d) showing the elements present in the doped nanoparticles

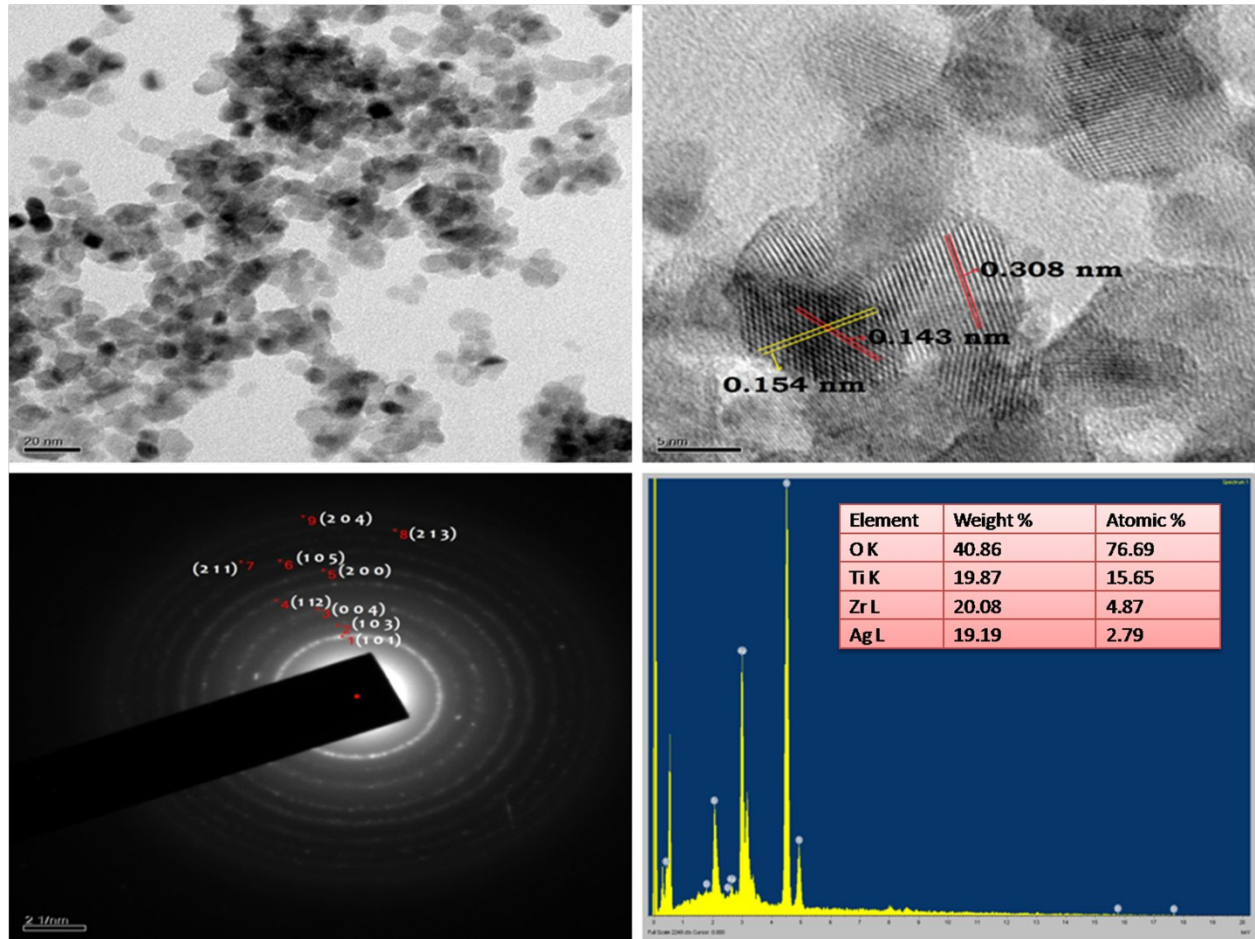

(a)

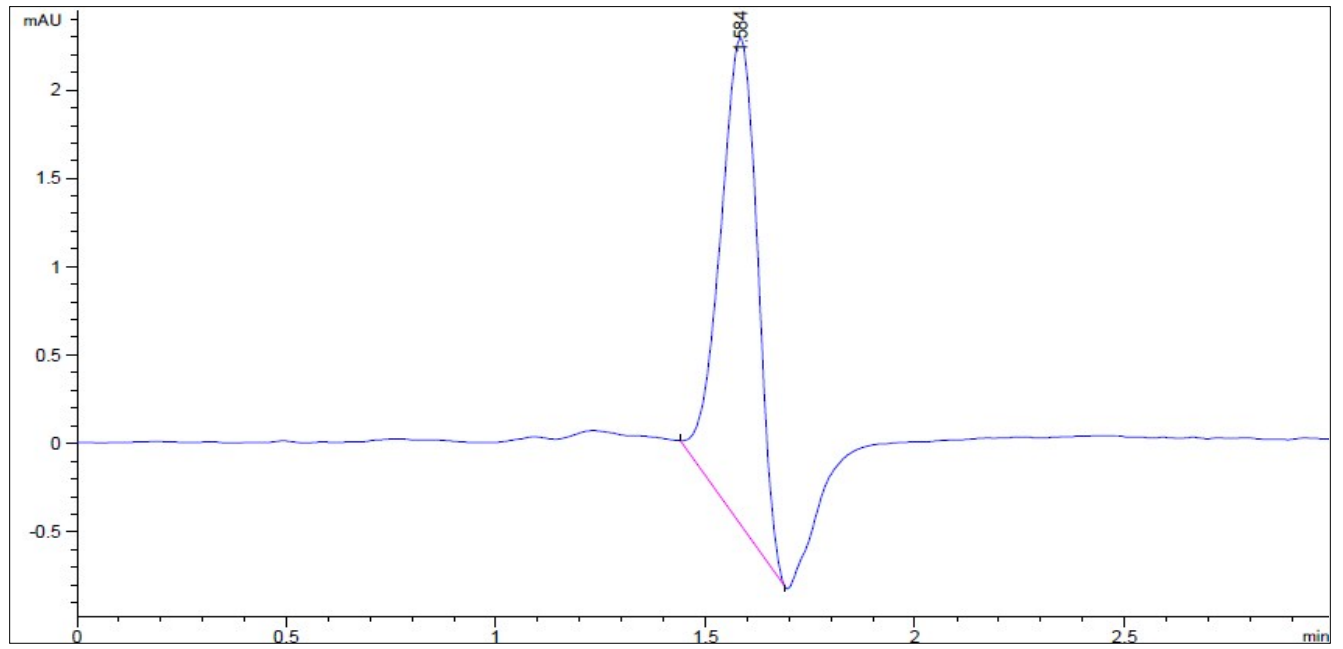

(b)

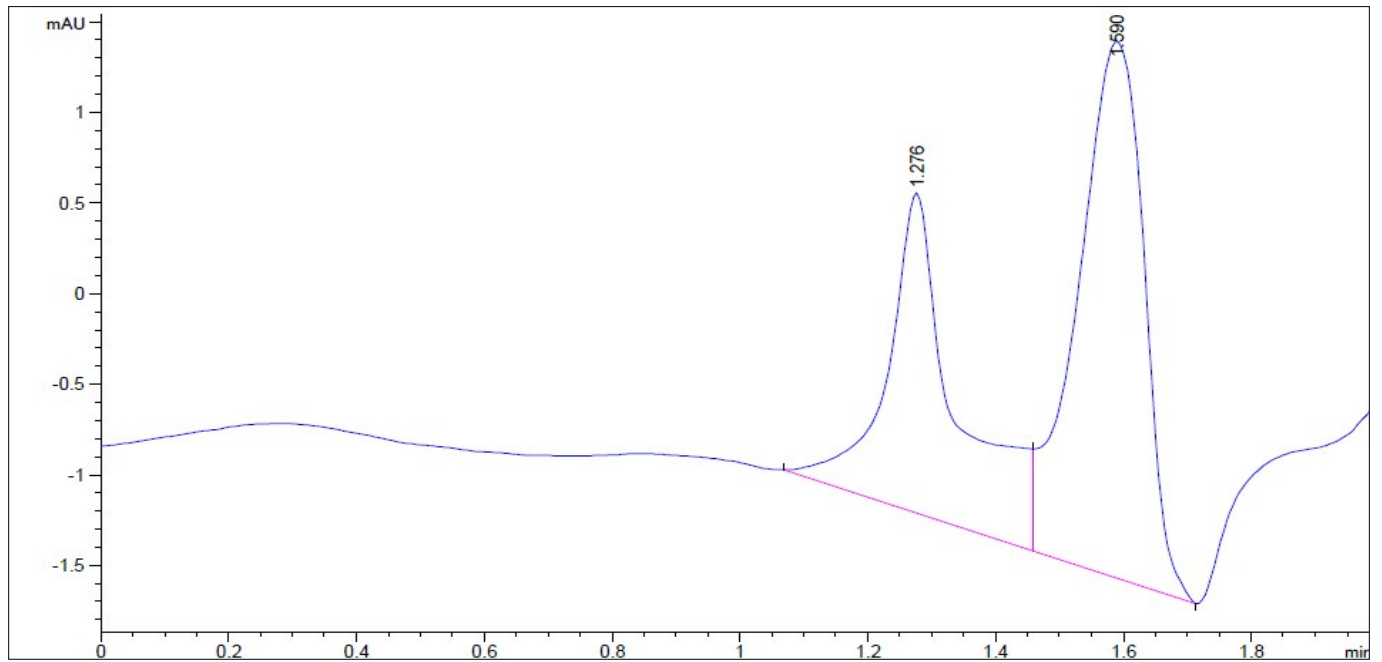

**Fig. S4:** HPLC chromatogram of EE2 extracted at 0 h (a) and degraded metabolites extracted at 5 h (b).

**(a)**

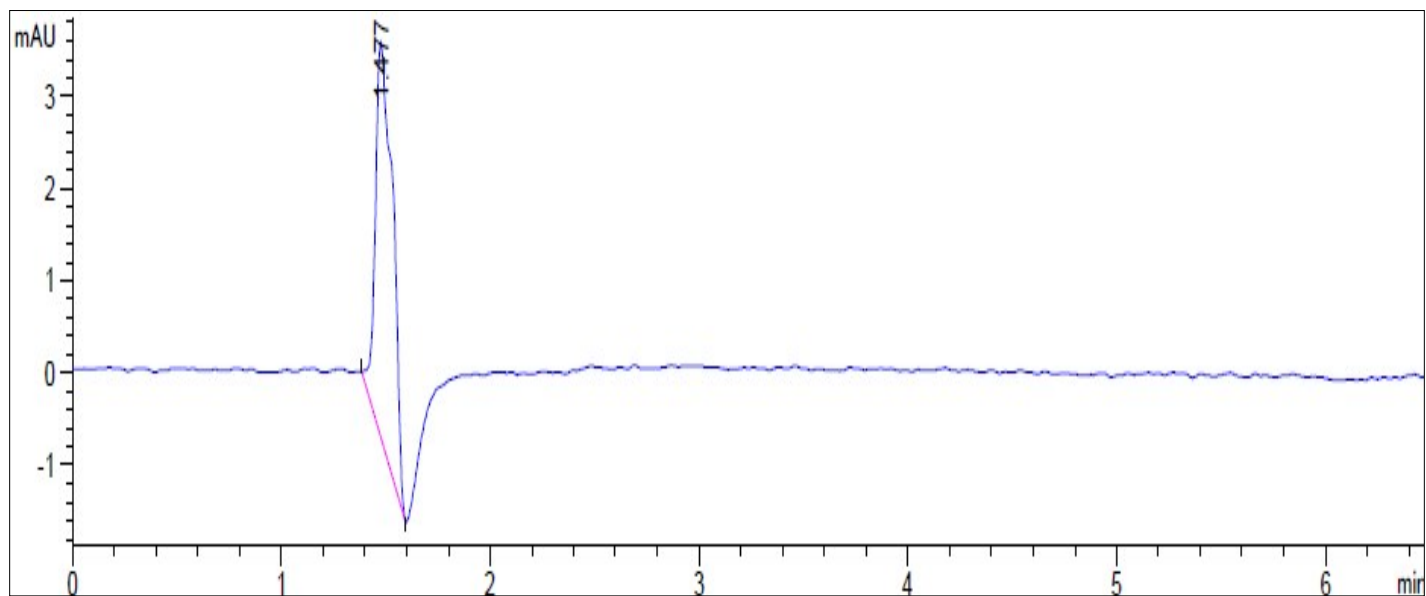

**(b)**

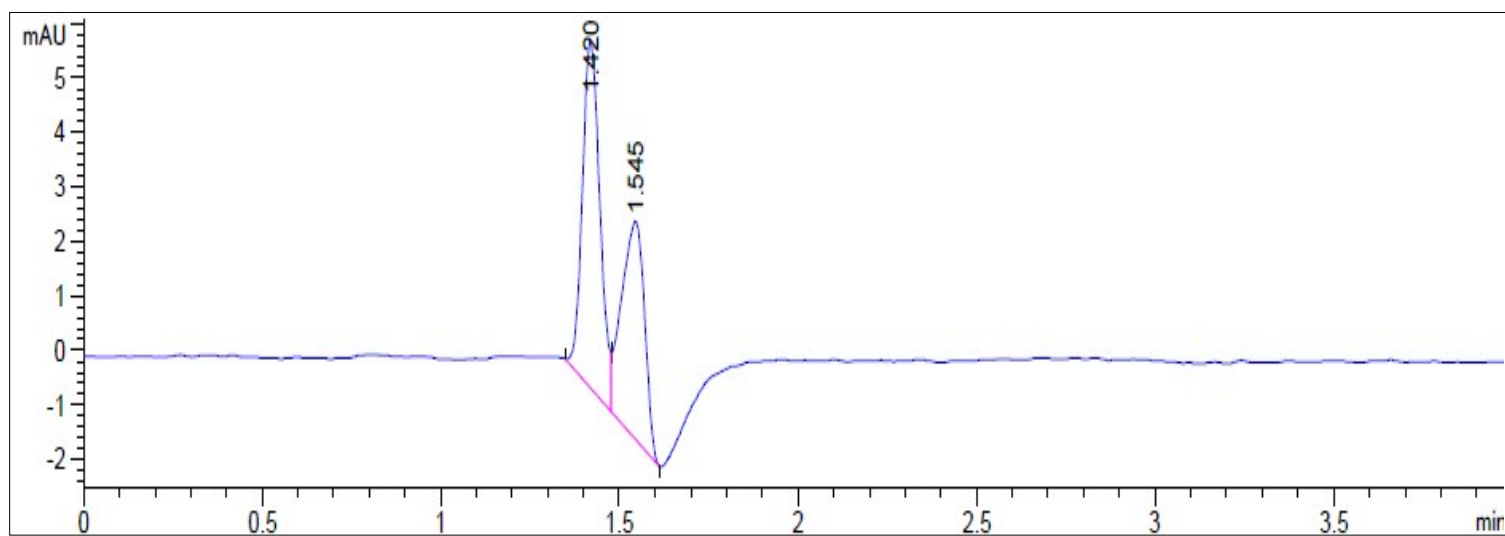

**Fig. S5:** HPLC chromatogram of AB-52 extracted at 0 h (a) and degraded metabolites extracted at 5 h (b).

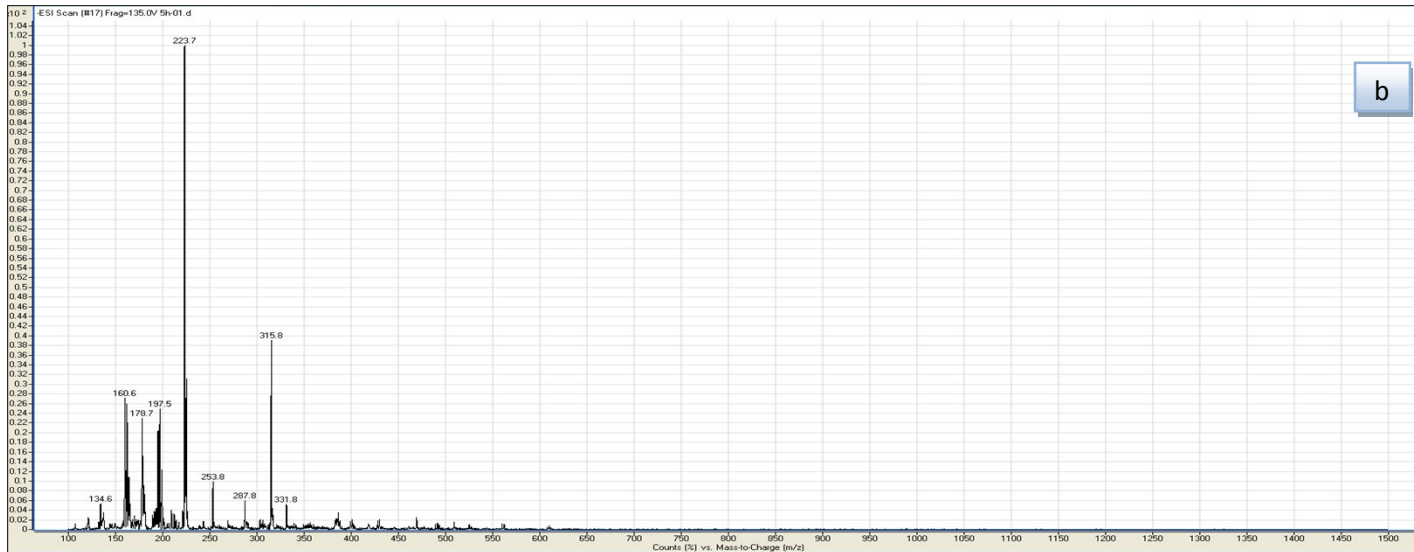

b

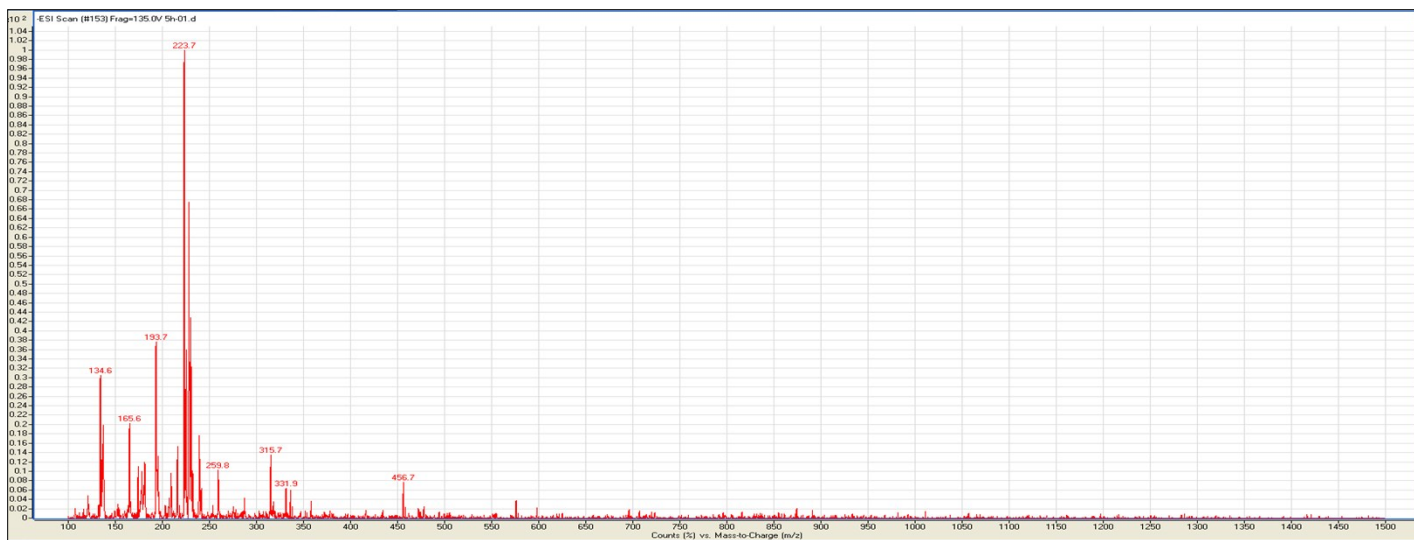

**Fig. S6:** LCMS fragmentation pattern of AB-52 degraded metabolites extracted at 3 h (a) & 5 h (b).

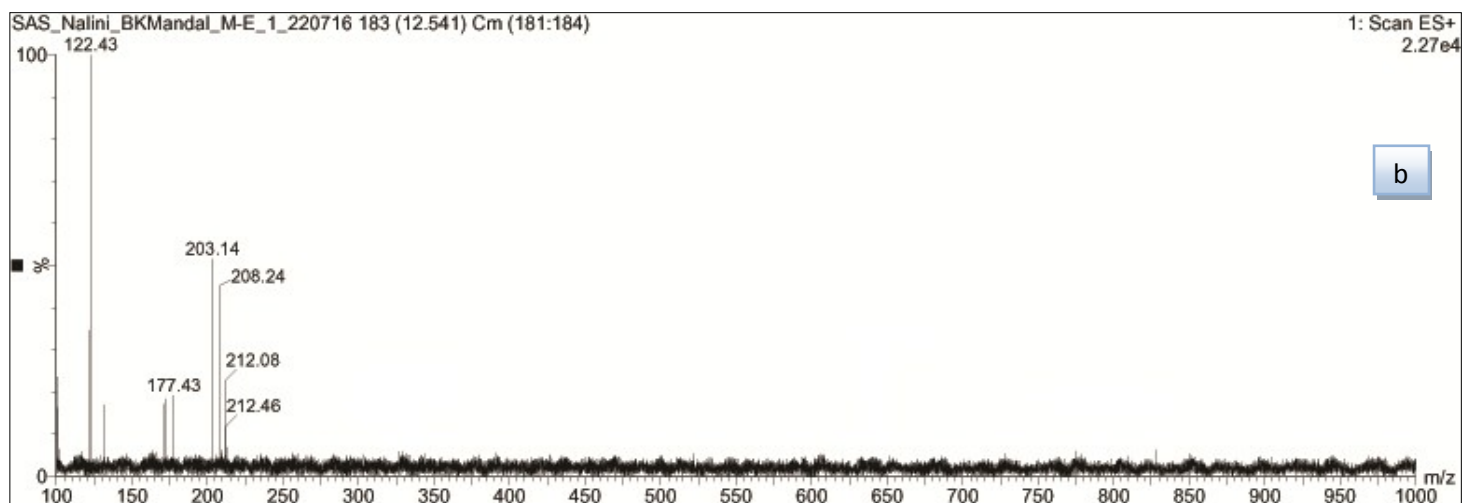

b

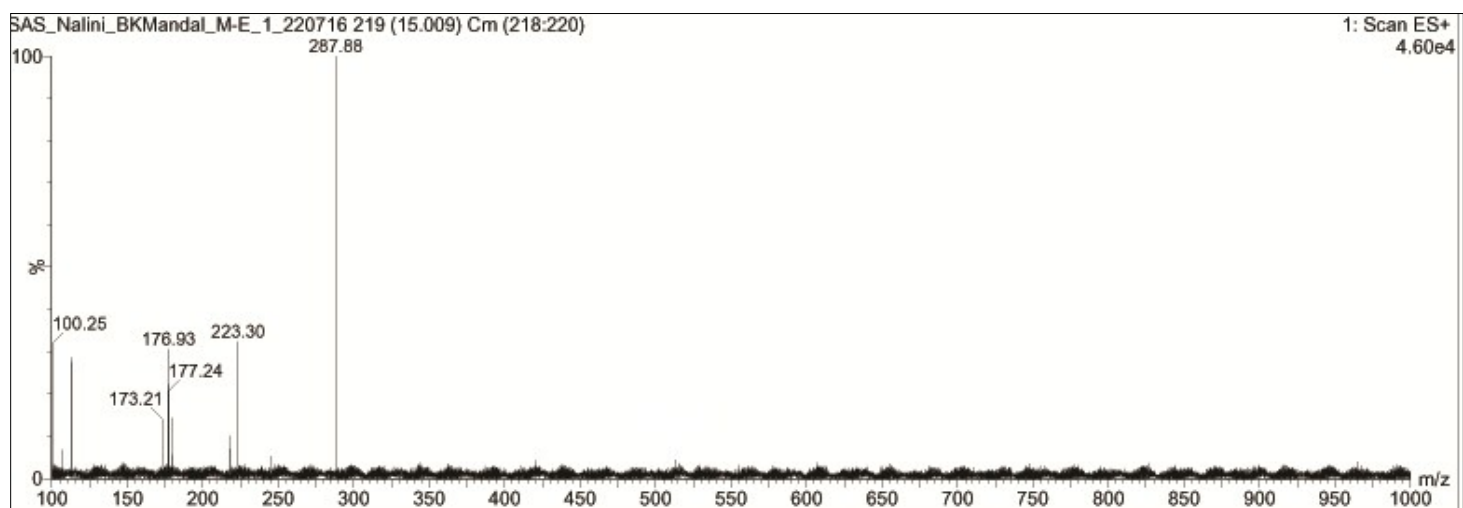

**Fig. S7:** LCMS fragmentation pattern of EE2 degraded metabolites extracted at 3 h (a) & 5 h (b).
